# Supplementary material
Source: PubMed Central journal article supplement (PMC3435152)
Supplement: 1202319109_pnas.201202319SI.pdf [file 1202319109_pnas.201202319SI.pdf]

# Supporting Information

Lau and Lennon 10.1073/pnas.1202319109

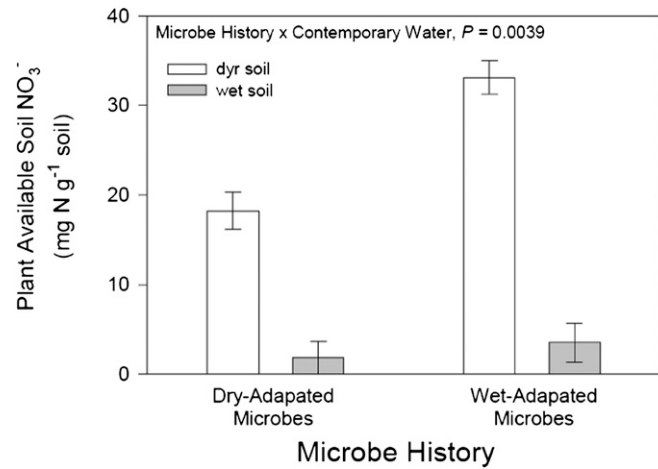

**Fig. S1.** Microbe history and contemporary soil moisture (dry, white bars; wet, gray bars) altered soil  $\text{NO}_3^-$  concentrations.  $\text{NO}_3^-$  was higher in dry contemporary soil-moisture treatments than in wet contemporary soil-moisture treatments, especially for soils containing a wet-adapted microbial community (microbe history  $\times$  contemporary moisture,  $P = 0.0037$ ). Error bars indicate least squares means  $\pm 1$  SEM.

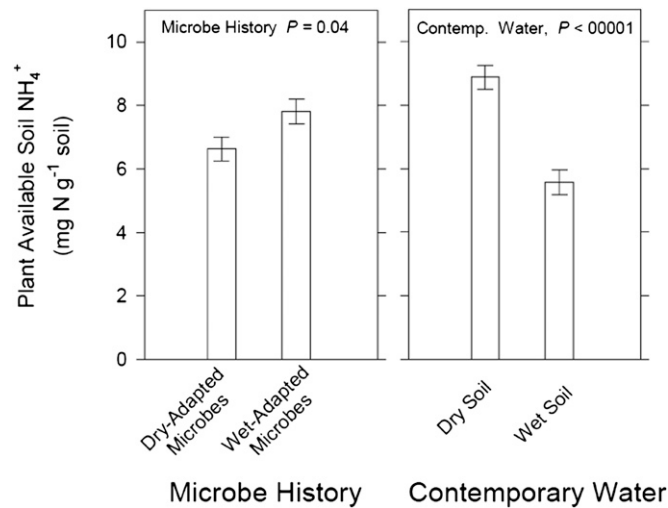

**Fig. S2.** Microbe history and contemporary soil-moisture treatments independently altered soil  $\text{NH}_4^+$  concentrations. Soil  $\text{NH}_4^+$  concentrations were higher in dry soils ( $P < 0.0001$ ) and in soils containing a wet-adapted microbial community ( $P = 0.04$ ). Error bars indicate least squares means  $\pm 1$  SEM.
